# Supplementary material for: Alcohol decreases intestinal ratio of Lactobacillus to Enterobacteriaceae and induces hepatic immune tolerance in a murine model of DSS-colitis
Source: PubMed Central journal article supplement (PMC7671045; doi:10.1080/19490976.2020.1838236), 2020-11-12
Supplement: KGMI_A_1838236_SM9358.pdf [file KGMI_A_1838236_SM9358.pdf]

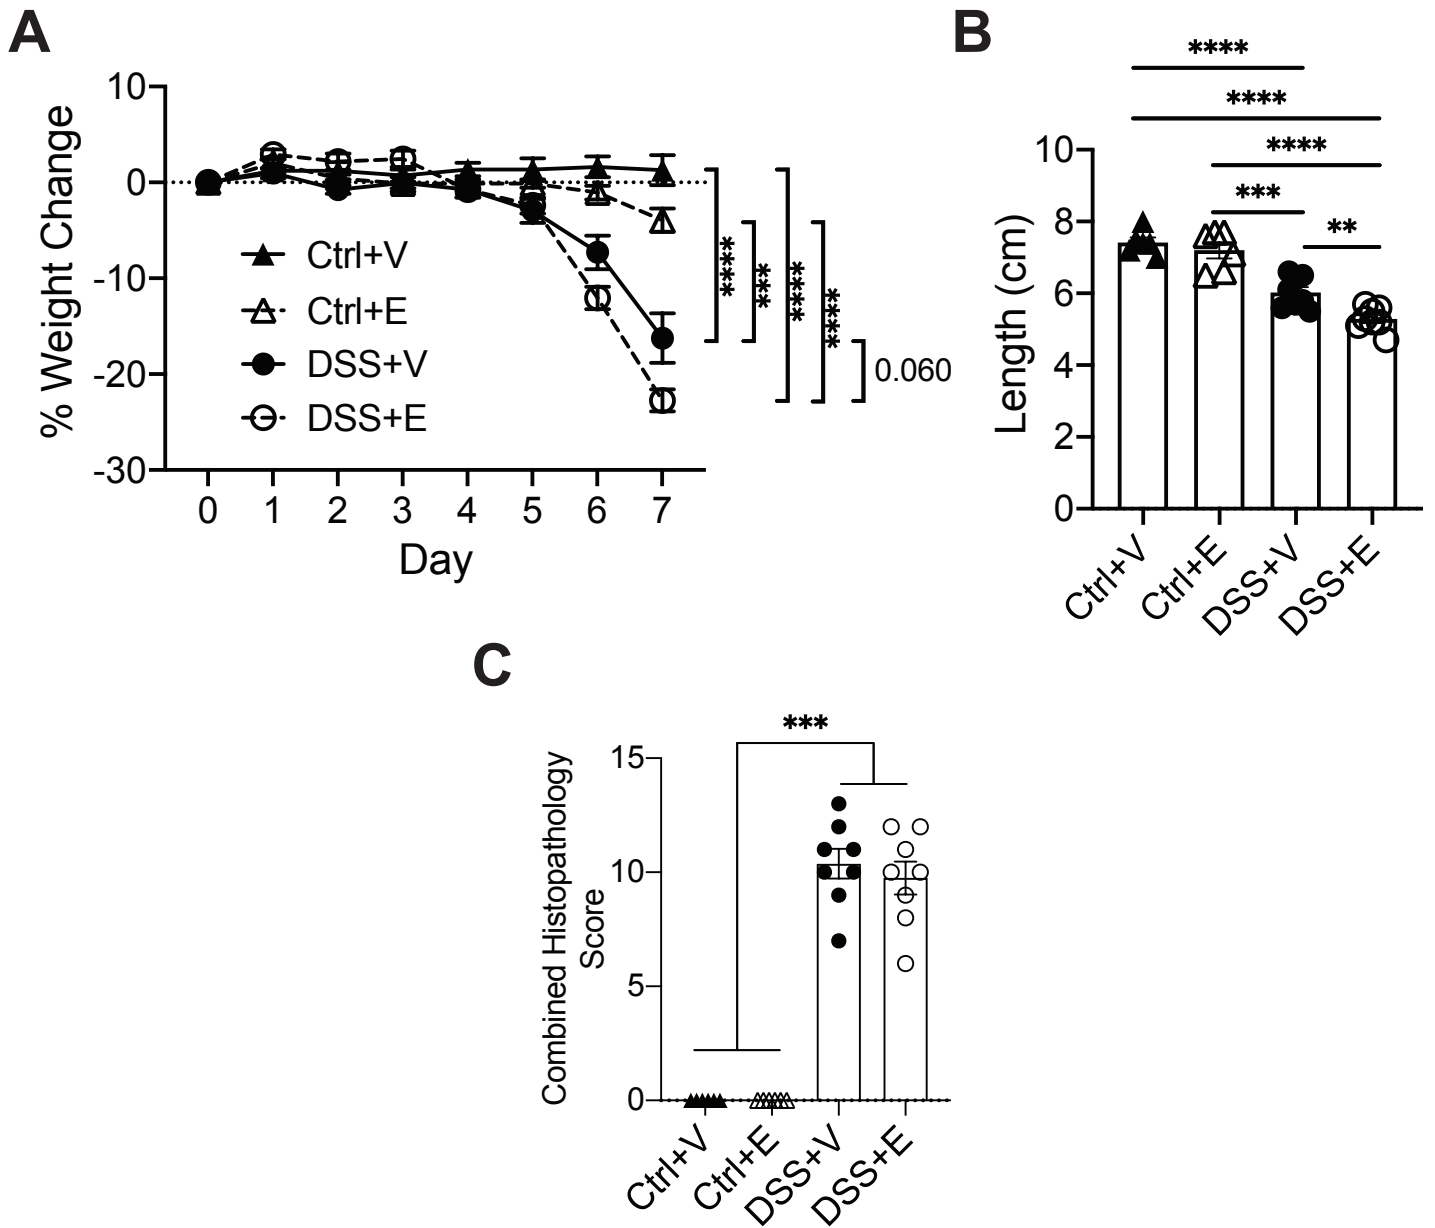

**Figure S1. Increased Weight Loss and Shorter Colons in DSS+Ethanol Mice.** (A) Mouse % weight change per experimental group, normalized to weight on day 0. Symbols represent the mean  $\pm$  SEM for the experimental group. (B) Mouse colon length after euthanasia on Day 7, 3 hours after the last gavage. (C) Combined histopathology score for the large intestine. Bars displays mean  $\pm$  SEM, with each symbol representing data from one mouse. Statistics by One-Way ANOVA with Tukey post-hoc test.  $n=6-8$  per group. \*\*  $p<0.01$ , \*\*\*  $p<0.001$ , \*\*\*\*  $p<0.0001$ .

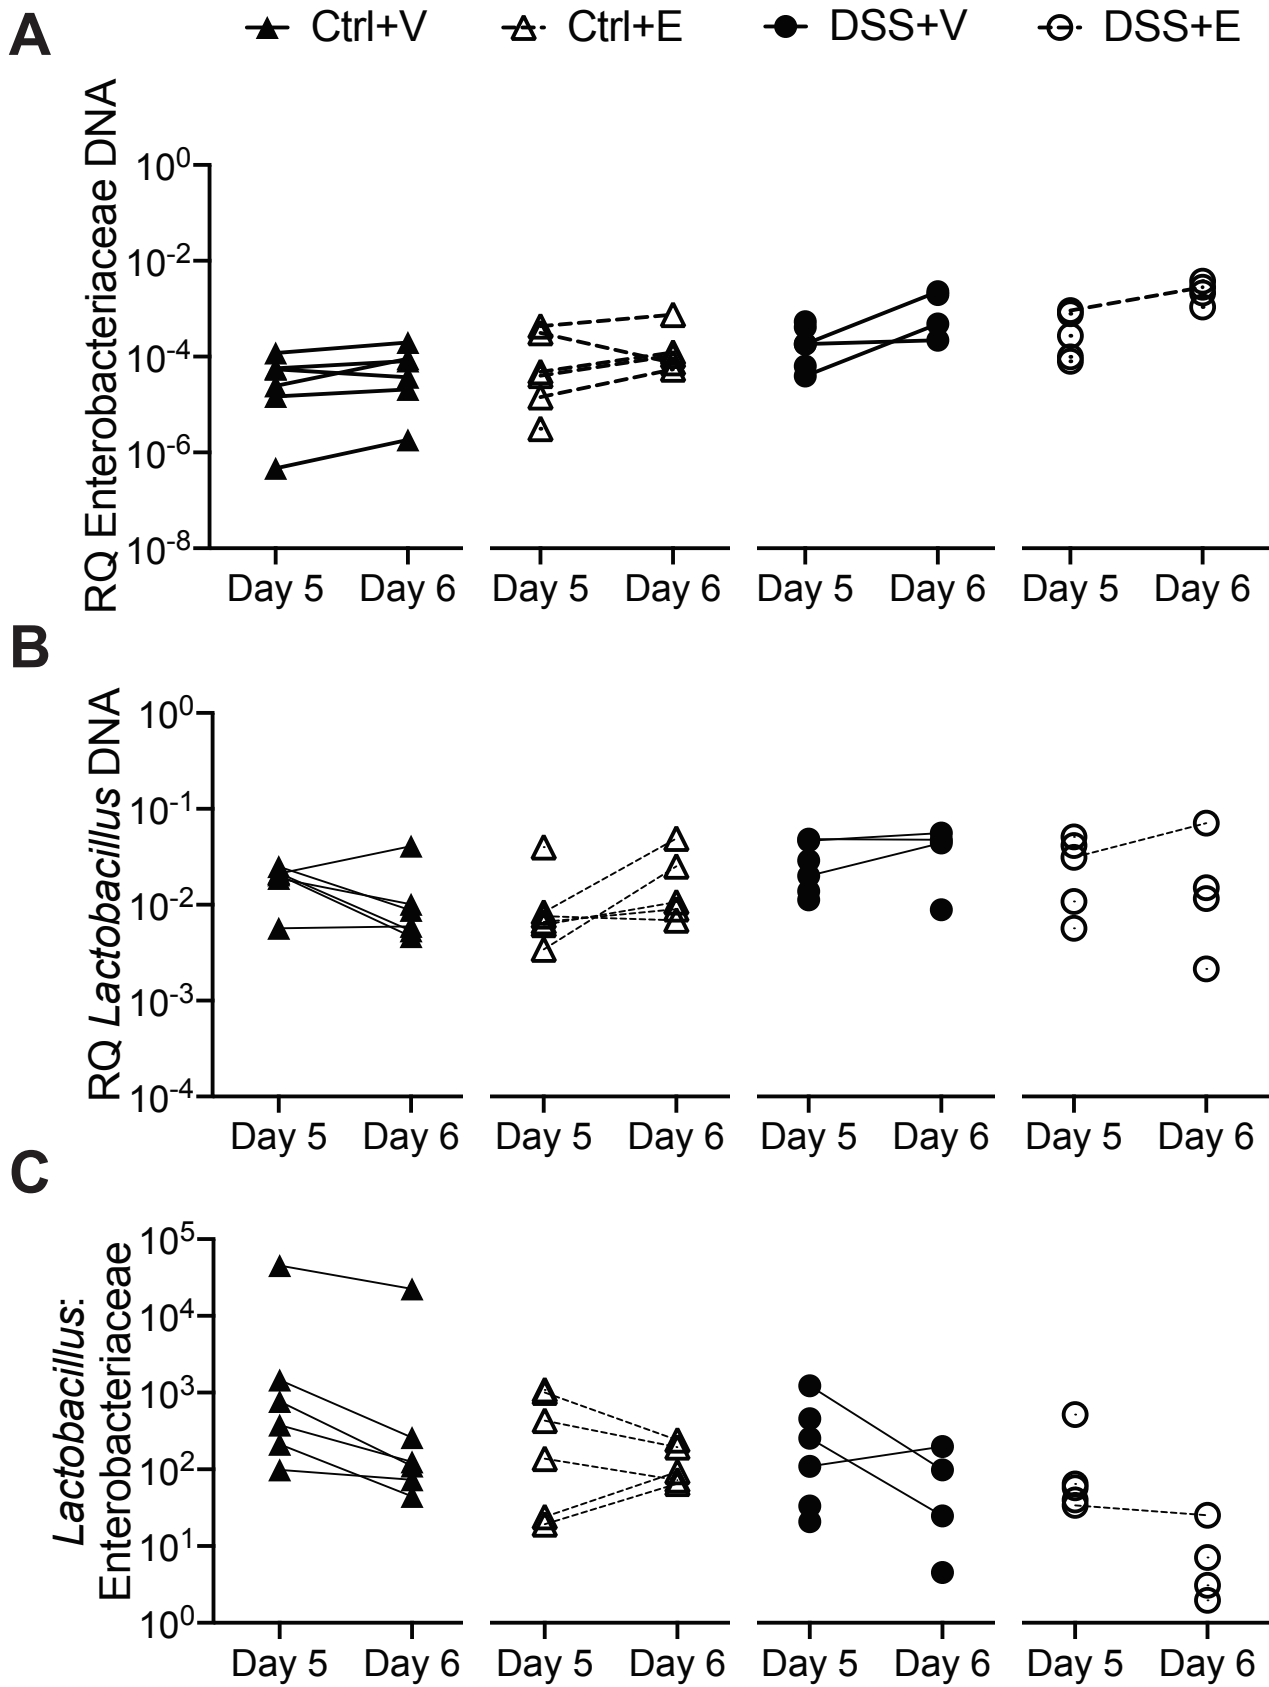

**Figure S2. Enterobacteriaceae, *Lactobacillus*, and *Lactobacillus*:Enterobacteriaceae per Individual Samples in Fecal Pellets from Day 5 to Day 6.** Fecal pellets were collected from mice after weighing and prior to gavage followed by DNA isolation, qPCR, and determination of bacterial RQ for (A) Enterobacteriaceae, (B) *Lactobacillus*, (C) *Lactobacillus*: Enterobacteriaceae. Each symbol represents data from one mouse with consecutive sampling from the same mouse indicated by a connecting line. RQ: Relative Quantity. n=4-6 per group.

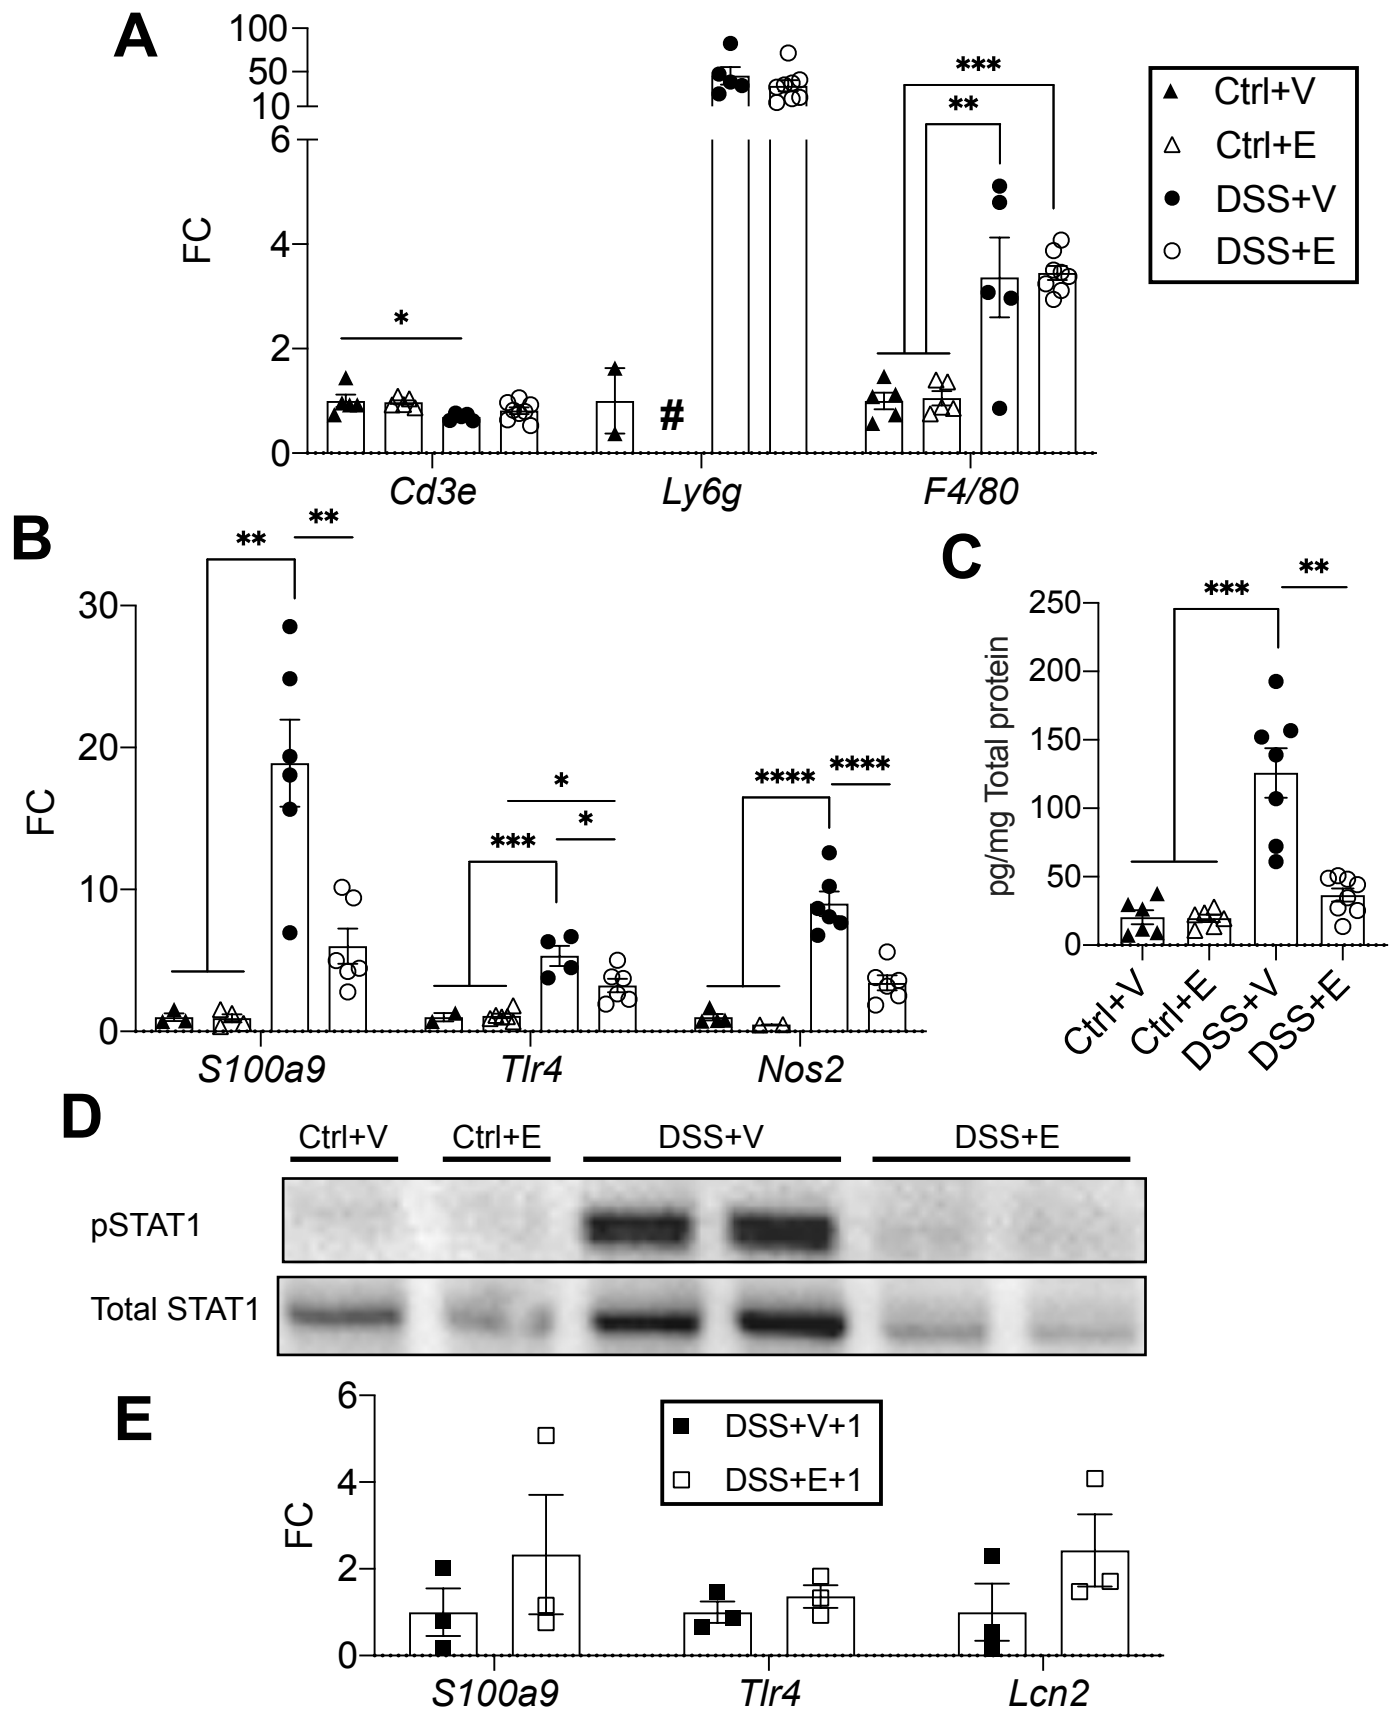

**Figure S3. Hepatic Immune Cell Profiling, Additional Inflammatory Gene Expression, and STAT1 Phosphorylation.** (A) Hepatic gene expression for infiltrating immune cells. # For Ly6g, all the Control+Ethanol samples were below the threshold for detection. n= 2-8 per group. (B) Hepatic inflammatory gene expression n=2-6 per group (C) Cxcl1 protein within liver homogenates. n=6-8 per group. (D) Hepatic pStat1 and total Stat1 western blot. (E) Hepatic inflammatory gene expression 24 hours after the last gavage of vehicle (DSS+V+1) or ethanol (DSS+E+1). n=3 per group. Bars displays mean  $\pm$  SEM, with each symbol representing data from one mouse. FC: Fold Change. Statistics by One-Way ANOVA with Tukey post-hoc test. \* p<0.05 \*\* p<0.01, \*\*\* p<0.001, \*\*\*\* p<0.0001.
